# Supplementary material for: The Contribution of Thai Fisheries to Sustainable Seafood Consumption: National Trends and Future Projections
Source: MDPI journal article supplement (doi:10.3390/foods10040880), 2021-04-17
Supplement: s1 [file s1]

# The contribution of Thai fisheries to sustainable seafood consumption: national trends and future projections

Tiptiwa Sampantamit<sup>1, 2, \*</sup>, Long Ho<sup>1\*</sup>, Carl Lachat<sup>3</sup>, Giles Hanley-Cook<sup>3</sup>, and Peter Goethals<sup>1</sup>

<sup>1</sup> Department of Animal Sciences and Aquatic Ecology, Faculty of Bioscience Engineering, Ghent University, 9000 Ghent, Belgium; Long.TuanHo@UGent.be (L.H.); Peter.Goethals@UGent.be (P.G.)

<sup>2</sup> Department of Biological and Environmental Sciences, Faculty of Science, Thaksin University, 93110 Patthalung, Thailand

<sup>3</sup> Department of Food Technology, Safety and Health, Ghent University, 9000 Ghent, Belgium; Carl.Lachat@UGent.be (C.L.); Giles.HanleyCook@UGent.be (G.H.-C.)

\*Correspondence: [Tiptiwa@tsu.ac.th](mailto:Tiptiwa@tsu.ac.th); [Long.tuanho@UGent.be](mailto:Long.tuanho@UGent.be)

**Table S1. Nutrient composition of fish and shellfish products**

| No.  | English name                   | Scientific name                | Family         | % Edible portion of whole fish or shellfish | Nutrition content per 100g edible raw portion |         |         |         | Source of nutrient composition of fish and shellfish products                      |
|------|--------------------------------|--------------------------------|----------------|---------------------------------------------|-----------------------------------------------|---------|---------|---------|------------------------------------------------------------------------------------|
|      |                                |                                |                |                                             | Protein (g)                                   | Ca (mg) | Fe (mg) | Zn (mg) |                                                                                    |
| Fish |                                |                                |                |                                             |                                               |         |         |         |                                                                                    |
| 1    | Short mackerel                 | <i>Rastrelliger brachysoma</i> | Scombridae     | 57                                          | 21.4                                          | 62      | 1.4     | 0.6     | Institute of Nutrition, Mahidol University (2014)                                  |
| 2    | Indian mackerel                | <i>Rastrelliger kanagurta</i>  | Scombridae     | 57                                          | 21.5                                          | 48      | 1.8     | 0.6     | Institute of Nutrition, Mahidol University (2014)                                  |
| 3    | Narrow-barred Spanish mackerel | <i>Scomberomorus commerson</i> | Scombridae     | 67                                          | 19.4                                          | 17      | 0.8     | 0.4     | Institute of Nutrition, Mahidol University (2014)                                  |
| 4    | Wolf-herrings                  | <i>Chirocentrus</i> spp.       | Chirocentridae | 60                                          | 21.8                                          | 23      | 0.5     | 0.6     | Siong et al. (1987); Tacon and Metian (2013)                                       |
| 5    | Longtail tuna                  | <i>Thunnus tonggol</i>         | Scombridae     | 58                                          | 24.4                                          | 4       | 0.8     | 0.4     | USDA (2019)                                                                        |
| 6    | Eastern little tuna            | <i>Euthynnus affinis</i>       | Scombridae     | 58                                          | 22                                            | 29      | 1.3     | 0.8     | USDA (2019)                                                                        |
| 7    | Round scads                    | <i>Decapterus</i> spp.         | Carangidae     | 49                                          | 20.4                                          | 61      | 1.2     | 0.3     | Food and Nutrition Research Institute, Department of Science and Technology (2019) |

| No. | English name          | Scientific name                    | Family        | % Edible portion of whole fish or shellfish | Nutrition content per 100g edible raw portion |         |         |         | Source of nutrient composition of fish and shellfish products              |
|-----|-----------------------|------------------------------------|---------------|---------------------------------------------|-----------------------------------------------|---------|---------|---------|----------------------------------------------------------------------------|
|     |                       |                                    |               |                                             | Protein (g)                                   | Ca (mg) | Fe (mg) | Zn (mg) |                                                                            |
| 8   | Hardtail scad         | <i>Megalaspis cordyla</i>          | Carangidae    | 42                                          | 21.3                                          | 58      | 2.3     | 0.3     | Institute of Nutrition, Mahidol University (2014)                          |
| 9   | Trevallies            | <i>Selaroides leptolepis</i>       | Carangidae    | 48                                          | 21.4                                          | 54      | 0.9     | 0.3     | Siong et al. (1987); Institute of Nutrition, Mahidol University (2014)     |
| 10  | Big-eye scad          | <i>Caranx sexfasciatus</i>         | Carangidae    | 44                                          | 21.5                                          | 80      | 0.8     | 0.3     | Siong et al. (1987); Institute of Nutrition, Mahidol University (2014)     |
| 11  | Black banded kingfish | <i>Seriolina nigrofasciata</i>     | Carangidae    | 48                                          | 18.6                                          | 42      | 0.6     | 0.3     | Institute of Nutrition, Mahidol University (2014)                          |
| 12  | Threadfin             | <i>Eleutheronema tetradactylum</i> | Polynemidae   | 57                                          | 20.2                                          | 32      | 0.5     | 0.6     | Institute of Nutrition, Mahidol University (2014); Tacon and Metian (2013) |
| 13  | Sardines              | <i>Sardinella</i> spp.             | Clupeidae     | 65                                          | 17.5                                          | 80      | 3       | 0.9     | National Institute of Nutrition (2007)                                     |
| 14  | Anchovies             | <i>Stolephorus</i> spp.            | Engraulidae   | 100                                         | 18.5                                          | 168     | 1       | 0.7     | Institute of Nutrition, Mahidol University (2014)                          |
| 15  | Mullet                | <i>Liza</i> spp.                   | Mugilidae     | 50                                          | 24.7                                          | 94      | 4.3     | 0.5     | Institute of Nutrition, Mahidol University (2014)                          |
| 16  | Black pomfret         | <i>Parastromateus niger</i>        | Carangidae    | 49                                          | 19.8                                          | 43      | 0.6     | 0.3     | Institute of Nutrition, Mahidol University (2014)                          |
| 17  | Silver pomfret        | <i>Pampus argenteus</i>            | Stromateidae  | 58                                          | 19.4                                          | 15      | 0.6     | 0.3     | Institute of Nutrition, Mahidol University (2014)                          |
| 18  | Barrcudas             | <i>Sphyrnaena</i> spp.             | Sphyrnaenidae | 58                                          | 17.6                                          | 11.4    | 0.5     | 0.4     | Nutrition division (2001); Longvah et al. (2017)                           |
| 19  | Tunas                 | <i>Thunnus</i> spp.                | Scombridae    | 58                                          | 24.4                                          | 4       | 0.8     | 0.4     | USDA (2019)                                                                |
| 20  | Croaker               | <i>Johnius</i> spp.                | Sciaenidae    | 50                                          | 18.6                                          | 32      | 0.4     | 0.7     | Institute of Nutrition, Mahidol University (2014)                          |
| 21  | Threadfin breams      | <i>Nemipterus hexodon</i>          | Nemipteridae  | 50                                          | 18.1                                          | 46      | 0.5     | 0.4     | Ministry of Education Culture Sports Science and Technology (2005)         |
| 22  | Monocle breams        | <i>Scolopsis</i> spp.              | Nemipteridae  | 50                                          | 18.1                                          | 46      | 0.5     | 0.4     | Ministry of Education Culture Sports Science and Technology (2005)         |

| No. | English name    | Scientific name                                 | Family         | % Edible portion of whole fish or shellfish | Nutrition content per 100g edible raw portion |         |         |         | Source of nutrient composition of fish and shellfish products              |
|-----|-----------------|-------------------------------------------------|----------------|---------------------------------------------|-----------------------------------------------|---------|---------|---------|----------------------------------------------------------------------------|
|     |                 |                                                 |                |                                             | Protein (g)                                   | Ca (mg) | Fe (mg) | Zn (mg) |                                                                            |
| 23  | Lizard fish     | <i>Saurida</i> spp.                             | Synodontidae   | 55                                          | 20.1                                          | 80      | 0.3     | 0.4     | Ministry of Education Culture Sports Science and Technology (2005)         |
| 24  | Hairtail        | <i>Trichiurus</i> spp.                          | Trichiuridae   | 59                                          | 18.3                                          | 36      | 0.2     | 0.4     | National Institute of Nutrition (2007); Longvah et al. (2017)              |
| 25  | Red snappers    | <i>Lutjanus argentimaculatus</i>                | Latjanidae     | 50                                          | 16.9                                          | 31      | 0.6     | 0.1     | Institute of Nutrition, Mahidol University (2014)                          |
| 26  | Sea bass        | <i>Lates calcarifer</i>                         | Latidae        | 55                                          | 20.5                                          | 26      | 0.4     | 0.6     | Institute of Nutrition, Mahidol University (2014); Tacon and Metian (2013) |
| 27  | Big-eyes        | <i>Priacanthus</i> spp.                         | Priacanthidae  | 72                                          | 21.5                                          | 17.4    | 0.6     | 0.4     | Longvah et al. (2017)                                                      |
| 28  | Sand whittings  | <i>Sillago sihama</i>                           | Sillaginidae   | 51                                          | 18.5                                          | 27      | 0.1     | 0.4     | Ministry of Education Culture Sports Science and Technology (2005)         |
| 29  | Catfish eel     | <i>Plotosus</i> spp.                            | Plotosidae     | 60                                          | 17.5                                          | 14      | 0.8     | 0.6     | Siong et al. (1987); Tacon and Metian (2013)                               |
| 30  | Sea catfish     | <i>Arius</i> spp.                               | Ariidae        | 45                                          | 21.6                                          | 14.7    | 0.5     | 0.8     | Longvah et al. (2017)                                                      |
| 31  | Rays            | Rays mixed species                              | Mixed groups   | 40                                          | 24.0                                          | 9.2     | 0.7     | 0.4     | Longvah et al. (2017)                                                      |
| 32  | Sharks          | Shark mixed species                             | Mixed groups   | 35                                          | 21.0                                          | 34      | 0.8     | 0.4     | USDA (2019)                                                                |
| 33  | Flatfish        | <i>Paraplagusia</i> spp.                        | Cynoglossidae  | 55                                          | 19.2                                          | 36      | 0.3     | 0.5     | Ministry of Education Culture Sports Science and Technology (2005)         |
| 34  | Indian halibut  | <i>Psettodes erumei</i>                         | Psettodidae    | 49                                          | 20.6                                          | 43      | 0.4     | 0.3     | Nutrition division (2001); Longvah et al. (2017); Siong et al. (1987)      |
| 35  | Conger eel      | <i>Muraenesox</i> spp.<br><i>Congresox</i> spp. | Muraenesocidae | 60                                          | 22.3                                          | 79      | 0.2     | 0.6     | Ministry of Education Culture Sports Science and Technology (2005)         |
| 36  | Groupers        | <i>Epinephelus coioides</i>                     | Serranidae     | 44                                          | 18.9                                          | 54      | 0.4     | 0.2     | Institute of Nutrition, Mahidol University (2014)                          |
| 37  | Other food fish | Fish mixed species                              | Mixed group    | 39                                          | 17                                            | 16      | 0.3     | 0.6     | Fellows and Hampton (1992); Tacon and Metian (2013)                        |
| 38  | Trash fish      | Fish mixed species                              | Mixed group    | 39                                          | 17                                            | 16      | 0.3     | 0.6     | Fellows and Hampton (1992); Tacon and Metian (2013)                        |

| No. | English name        | Scientific name                    | Family           | % Edible portion of whole fish or shellfish | Nutrition content per 100g edible raw portion |         |         |         | Source of nutrient composition of fish and shellfish products              |
|-----|---------------------|------------------------------------|------------------|---------------------------------------------|-----------------------------------------------|---------|---------|---------|----------------------------------------------------------------------------|
|     |                     |                                    |                  |                                             | Protein (g)                                   | Ca (mg) | Fe (mg) | Zn (mg) |                                                                            |
| 39  | Common silver carp  | <i>Barbonymus gonionotus</i>       | Cyprinidae       | 50                                          | 21.1                                          | 32      | 0.6     | 0.1     | Institute of Nutrition, Mahidol University (2014)                          |
| 40  | Snakeskin gourami   | <i>Trichopodus pectoralis</i>      | Osphronemidae    | 48                                          | 17.6                                          | 59      | 1.8     | 0.6     | Institute of Nutrition, Mahidol University (2014); USDA (2019)             |
| 41  | Walking catfish     | <i>Clarias</i> spp.                | Clariidae        | 70                                          | 17.8                                          | 20      | 0.8     | 0.2     | Institute of Nutrition, Mahidol University (2014)                          |
| 42  | Striped snake head  | <i>Channa striata</i>              | Channidae        | 46                                          | 20.5                                          | 31      | 5.8     | 0.6     | Nutrition division (2001); Tacon and Metian (2013)                         |
| 43  | Fish mixed group    | Fish mixed group                   | Fish mixed group | 39                                          | 17                                            | 16      | 0.3     | 0.6     | Fellows and Hampton (1992); Tacon and Metian (2013)                        |
| 44  | Nile tilapia        | <i>Oreochromis niloticus</i>       | Cichlidae        | 30                                          | 18.3                                          | 15      | 0.8     | 0.4     | FAO (2016)                                                                 |
| 45  | Common carp         | <i>Cyprinus</i> spp.               | Cyprinidae       | 50                                          | 17                                            | 26      | 1.2     | 1.5     | Institute of Nutrition, Mahidol University (2014)                          |
| 46  | Chinese major carps | Fish mixed species                 | Cyprinidae       | 50                                          | 21.1                                          | 32      | 0.6     | 0.1     | Institute of Nutrition, Mahidol University (2014)                          |
| 47  | Striped catfish     | <i>Pangasianodon hypophthalmus</i> | Pangasiidae      | 50                                          | 15.0                                          | 24      | 1.4     | 0.1     | Institute of Nutrition, Mahidol University (2014)                          |
| 48  | Java tilapia        | <i>Oreochromis mossambicus</i>     | Cichlidae        | 30                                          | 18.3                                          | 15      | 0.8     | 0.4     | FAO (2016)                                                                 |
| 49  | Sand Goby           | <i>Oxyeleotris marmorata</i>       | Eleotridae       | 44                                          | 17.1                                          | 29      | 0.8     | 0.6     | Institute for Medical Research (1997); Tacon and Metian (2013)             |
| 50  | Giant qourami       | <i>Osphronemus goramy</i>          | Osphroneminae    | 48                                          | 17.6                                          | 59      | 1.8     | 0.6     | Institute of Nutrition, Mahidol University (2014); Tacon and Metian (2013) |
| 51  | Swamp eel           | <i>Monopterus albus</i>            | Synbranchidae    | 52                                          | 19.7                                          | 33      | 1.7     | 0.8     | Institute of Nutrition, Mahidol University (2014)                          |
| 52  | Roho labeo          | <i>Labeo rohita</i>                | Cyprinidae       | 50                                          | 16.9                                          | 19      | 1.2     | 0.6     | Institute for Medical Research (1997); Tacon and Metian (2013)             |

| No.     | English name          | Scientific name             | Family        | % Edible portion of whole fish or shellfish | Nutrition content per 100g edible raw portion |         |         |         | Source of nutrient composition of fish and shellfish products                                      |
|---------|-----------------------|-----------------------------|---------------|---------------------------------------------|-----------------------------------------------|---------|---------|---------|----------------------------------------------------------------------------------------------------|
|         |                       |                             |               |                                             | Protein (g)                                   | Ca (mg) | Fe (mg) | Zn (mg) |                                                                                                    |
| 53      | Grey featherback      | <i>Notopterus</i> spp.      | Notopteridae  | 57                                          | 19.6                                          | 77      | 0.3     | 0.6     | Institute of Nutrition, Mahidol University (2014); Tacon and Metian (2013)                         |
| 54      | Spot pangasius        | <i>Pangasius larnaudii</i>  | Pangasiidae   | 50                                          | 16.6                                          | 11      | 0.5     | 0.6     | Institute for Medical Research (1997); Tacon and Metian (2013)                                     |
| 55      | Moonlight gourami     | <i>Trichopodus</i> spp.     | Osphronemidae | 48                                          | 17.6                                          | 59      | 1.8     | 0.6     | Institute of Nutrition, Mahidol University (2014); Tacon and Metian (2013)                         |
| 56      | Common climbing perch | <i>Anabas testudineus</i>   | Anabantidae   | 44                                          | 17.9                                          | 110     | 1.2     | 0.6     | Institute of Nutrition, Mahidol University (2014); Tacon and Metian (2013)                         |
| 57      | Giant Snakehead       | <i>Channa micropeltes</i>   | Channidae     | 46                                          | 20.5                                          | 31      | 5.8     | 0.6     | Nutrition division (2001); Tacon and Metian (2013)                                                 |
| 58      | Mrigal carp           | <i>Cirrhinus mrigala</i>    | Cyprinidae    | 50                                          | 21.1                                          | 32      | 0.6     | 0.1     | Institute of Nutrition, Mahidol University (2014)                                                  |
| Shrimps |                       |                             |               |                                             |                                               |         |         |         |                                                                                                    |
| 1       | Banana shrimp         | <i>Penaeus merguensis</i>   | Penaeidae     | 62                                          | 19                                            | 64      | 1.4     | 1.4     | Food and Nutrition Research Institute, Department of Science and Technology (2019) and USDA (2019) |
| 2       | Jumbo tiger prawn     | <i>Penaeus monodon</i>      | Penaeidae     | 63                                          | 20                                            | 65      | 2.2     | 1.4     | Food and Nutrition Research Institute, Department of Science and Technology (2019)                 |
| 3       | White shrimp          | <i>Litopenaeus vannamei</i> | Penaeidae     | 80                                          | 19.6                                          | 68      | 1.4     | 1.2     | Ministry of Education Culture Sports Science and Technology (2005)                                 |
| 4       | Tiger shrimp          | <i>Penaeus monodon</i>      | Penaeidae     | 63                                          | 20                                            | 65      | 2.2     | 1.4     | Food and Nutrition Research Institute, Department of Science and Technology (2019)                 |
| 5       | king prawn            | <i>Penaeus latisulcatus</i> | Penaeidae     | 57                                          | 23.9                                          | 45      | 1.4     | 1.5     | FAO (2016)                                                                                         |

| No.      | English name       | Scientific name                                                                   | Family             | % Edible portion of whole fish or shellfish | Nutrition content per 100g edible raw portion |         |         |         | Source of nutrient composition of fish and shellfish products                      |
|----------|--------------------|-----------------------------------------------------------------------------------|--------------------|---------------------------------------------|-----------------------------------------------|---------|---------|---------|------------------------------------------------------------------------------------|
|          |                    |                                                                                   |                    |                                             | Protein (g)                                   | Ca (mg) | Fe (mg) | Zn (mg) |                                                                                    |
| 6        | School prawn       | <i>Metapenaeus</i> spp.                                                           | Penaeidae          | 50                                          | 18.7                                          | 56      | 1       | 1       | Ministry of Education Culture Sports Science and Technology (2005)                 |
| 7        | Other shrimp       | Shrimp mixed species                                                              | Penaeidae          | 57                                          | 20.1                                          | 64      | 0.5     | 1.3     | Tacon and Metian (2013)                                                            |
| 8        | Aetes              | <i>Acetes</i> spp.                                                                | Sargestidae        | 100                                         | 12                                            | 64      | 3.4     | 1.3     | Ministry of Education Culture Sports Science and Technology (2005)                 |
| 9        | Flathead lobster   | <i>Thenus orientalis</i>                                                          | Scyllarodae        | 30                                          | 20.6                                          | 49      | 1.2     | 0.4     | USDA (2019)                                                                        |
| 10       | Mantis shrimp      | <i>Harpiosquilla raphidea</i> ,<br><i>Miyakea nepa</i> , <i>Oratosquilla nepa</i> | Squillidae         | 30                                          | 20.6                                          | 49      | 1.2     | 0.4     | USDA (2019)                                                                        |
| 11       | Macrobracium       | <i>Macrobrachium rosenbergii</i>                                                  | Palaemonidae       | 54                                          | 17.9                                          | 17      | 1       | 1.3     | Institute of Nutrition, Mahidol University (2014)                                  |
| 12       | Shrimp mixed group | Shrimp mixed group                                                                | Shrimp mixed group | 57                                          | 13.6                                          | 54      | 1.2     | 3       | Tacon and Metian (2013)                                                            |
| Crabs    |                    |                                                                                   |                    |                                             |                                               |         |         |         |                                                                                    |
| 1        | Swimming crabs     | <i>Portunus pelagicus</i>                                                         | Potunidae          | 35                                          | 16.2                                          | 127     | 1.7     | 1.7     | Tacon and Metian (2013); Nutrition division (2001)                                 |
| 2        | Mangrove crabs     | <i>Scylla serrate</i>                                                             | Potunidae          | 42                                          | 17.9                                          | 183     | 2.6     | 3       | Institute of Nutrition, Mahidol University (2014); Tacon and Metian (2013)         |
| 3        | Other crabs        | Crab mixed species                                                                | Mixed groups       | 20                                          | 17.2                                          | 153     | 1.2     | 3       | FAO (2016)                                                                         |
| Molluscs |                    |                                                                                   |                    |                                             |                                               |         |         |         |                                                                                    |
| 1        | Blood cockle       | <i>Anadara granosa</i>                                                            | Arcidae            | 25                                          | 11.7                                          | 181     | 10.5    | 2.4     | USDA (2019)                                                                        |
| 2        | Green mussel       | <i>Perna viridis</i>                                                              | Mytilidae          | 56                                          | 9.3                                           | 25      | 10.3    | 1       | USDA (2019)                                                                        |
| 3        | Oyster             | <i>Saccostrea</i> spp.                                                            | Ostreidae          | 12                                          | 5.9                                           | 147     | 5.9     | 7.1     | Food and Nutrition Research Institute, Department of Science and Technology (2019) |
| 4        | Horse mussel       | <i>Musculus senhousia</i>                                                         | Mytilidae          | 56                                          | 9.3                                           | 25      | 10.3    | 1       | USDA (2019)                                                                        |

| No.    | English name      | Scientific name                | Family              | % Edible portion of whole fish or shellfish | Nutrition content per 100g edible raw portion |         |         |         | Source of nutrient composition of fish and shellfish products |
|--------|-------------------|--------------------------------|---------------------|---------------------------------------------|-----------------------------------------------|---------|---------|---------|---------------------------------------------------------------|
|        |                   |                                |                     |                                             | Protein (g)                                   | Ca (mg) | Fe (mg) | Zn (mg) |                                                               |
| 5      | Short necked clam | <i>Paphia</i> spp.             | Veneridae           | 27                                          | 9.2                                           | 183     | 6.6     | 1.2     | FAO (2016)                                                    |
| 6      | Scallop           | <i>Amusium</i> spp.            | Pectinidae          | 13                                          | 22.3                                          | 14      | 0.6     | 0.9     | USDA (2019)                                                   |
| 7      | Other shellfishes | Mussel mixed species           | Mussel mixed Family | 11                                          | 14.7                                          | 39      | 1.6     | 0.5     | USDA (2019)                                                   |
| Squids |                   |                                |                     |                                             |                                               |         |         |         |                                                               |
| 1      | Squid             | <i>Loligo</i> spp.             | Loliginidae         | 96                                          | 15.6                                          | 32      | 0.7     | 1.5     | USDA (2019)                                                   |
| 2      | Cuttlefish        | <i>Sepia pharaonis</i>         | Sepiidae            | 65                                          | 15.9                                          | 16      | 1.1     | 1.5     | Institute of Nutrition, Mahidol University (2014)             |
| 3      | Bigfin reef squid | <i>Sepioteuthis lessoniana</i> | Loliginidae         | 96                                          | 15.6                                          | 32      | 0.7     | 1.5     | USDA (2019)                                                   |
| 4      | Octopus           | <i>Octopus</i> spp.            | Octopodidae         | 94                                          | 14.7                                          | 39      | 1.6     | 0.5     | USDA (2019)                                                   |

**Table S2. Average seafood intake in 187 countries. Source: GDD (2019)**

| No. | List of countries                       | Average seafood intake (g/capita/day) |
|-----|-----------------------------------------|---------------------------------------|
| 1   | Guatemala                               | 5.4                                   |
| 2   | Zimbabwe                                | 5.8                                   |
| 3   | Honduras                                | 6                                     |
| 4   | Nicaragua                               | 6.3                                   |
| 5   | El Salvador                             | 7.2                                   |
| 6   | Lesotho                                 | 7.4                                   |
| 7   | Botswana                                | 7.6                                   |
| 8   | Uzbekistan                              | 7.7                                   |
| 9   | Occupied Palestinian Territory          | 7.9                                   |
| 10  | Timor-Leste                             | 7.9                                   |
| 11  | Tajikistan                              | 8                                     |
| 12  | Colombia                                | 8.1                                   |
| 13  | Lebanon                                 | 8.1                                   |
| 14  | Costa Rica                              | 8.1                                   |
| 15  | Mongolia                                | 8.4                                   |
| 16  | Swaziland                               | 9.2                                   |
| 17  | Namibia                                 | 9.3                                   |
| 18  | South Africa                            | 9.4                                   |
| 19  | Mexico                                  | 9.4                                   |
| 20  | Syrian Arab Republic                    | 9.7                                   |
| 21  | Albania                                 | 10.2                                  |
| 22  | Armenia                                 | 10.3                                  |
| 23  | Kyrgyzstan                              | 10.4                                  |
| 24  | Bolivia                                 | 10.5                                  |
| 25  | Azerbaijan                              | 10.6                                  |
| 26  | Nepal                                   | 10.8                                  |
| 27  | Bosnia and Herzegovina                  | 10.9                                  |
| 28  | Eritrea                                 | 11.1                                  |
| 29  | Panama                                  | 11.7                                  |
| 30  | Pakistan                                | 11.7                                  |
| 31  | Macedonia (Former Yugoslav Republic of) | 11.8                                  |
| 32  | Venezuela (Bolivarian Republic of)      | 11.8                                  |
| 33  | Hungary                                 | 12.1                                  |
| 34  | Netherlands                             | 12.2                                  |
| 35  | Rwanda                                  | 12.4                                  |
| 36  | Serbia                                  | 12.7                                  |
| 37  | Romania                                 | 12.7                                  |
| 38  | Bulgaria                                | 12.8                                  |
| 39  | Djibouti                                | 12.9                                  |
| 40  | Slovenia                                | 13                                    |
| 41  | Slovakia                                | 13.1                                  |
| 42  | Kazakhstan                              | 13.2                                  |
| 43  | Sudan                                   | 13.2                                  |
| 44  | Afghanistan                             | 13.3                                  |
| 45  | Poland                                  | 13.5                                  |
| 46  | Turkmenistan                            | 13.7                                  |
| 47  | Bhutan                                  | 13.9                                  |
| 48  | Georgia                                 | 14.7                                  |
| 49  | Argentina                               | 14.9                                  |
| 50  | India                                   | 15                                    |
| 51  | Moldova                                 | 15.2                                  |
| 52  | Jordan                                  | 15.3                                  |
| 53  | Montenegro                              | 15.4                                  |
| 54  | Iraq                                    | 15.5                                  |
| 55  | Guinea-Bissau                           | 15.6                                  |
| 56  | Czech Republic                          | 15.6                                  |
| 57  | Oman                                    | 15.7                                  |
| 58  | Germany                                 | 15.9                                  |



| No. | List of countries                | Average seafood intake (g/capita/day) |
|-----|----------------------------------|---------------------------------------|
| 59  | Turkey                           | 16                                    |
| 60  | Belarus                          | 16.2                                  |
| 61  | Niger                            | 16.2                                  |
| 62  | Qatar                            | 16.3                                  |
| 63  | Uruguay                          | 16.3                                  |
| 64  | Ecuador                          | 16.3                                  |
| 65  | Mozambique                       | 16.4                                  |
| 66  | Bahrain                          | 16.4                                  |
| 67  | Canada                           | 16.6                                  |
| 68  | Haiti                            | 16.7                                  |
| 69  | Burundi                          | 16.8                                  |
| 70  | Croatia                          | 16.9                                  |
| 71  | Saudi Arabia                     | 16.9                                  |
| 72  | Libyan Arab Jamahiriya           | 17.1                                  |
| 73  | United States of America         | 17.4                                  |
| 74  | Yemen                            | 17.7                                  |
| 75  | Morocco                          | 17.8                                  |
| 76  | Burkina Faso                     | 17.9                                  |
| 77  | Kuwait                           | 18.6                                  |
| 78  | Central African Republic         | 19.2                                  |
| 79  | Tunisia                          | 19.3                                  |
| 80  | Lithuania                        | 19.4                                  |
| 81  | Iran (Islamic Republic of)       | 19.8                                  |
| 82  | Algeria                          | 19.8                                  |
| 83  | Ireland                          | 20                                    |
| 84  | Austria                          | 20.3                                  |
| 85  | Kenya                            | 20.5                                  |
| 86  | Ukraine                          | 20.5                                  |
| 87  | Egypt                            | 20.5                                  |
| 88  | Somalia                          | 21                                    |
| 89  | Estonia                          | 21.1                                  |
| 90  | Bangladesh                       | 21.2                                  |
| 91  | Dominican Republic               | 21.4                                  |
| 92  | United Arab Emirates             | 21.4                                  |
| 93  | Ethiopia                         | 21.5                                  |
| 94  | Democratic Republic of the Congo | 22.4                                  |
| 95  | Malawi                           | 22.8                                  |
| 96  | Australia                        | 23                                    |
| 97  | Cuba                             | 23.2                                  |
| 98  | Cyprus                           | 23.9                                  |
| 99  | Belgium                          | 24                                    |
| 100 | Mauritius                        | 24.1                                  |
| 101 | Israel                           | 24.1                                  |
| 102 | Belize                           | 24.1                                  |
| 103 | Switzerland                      | 24.4                                  |
| 104 | Latvia                           | 24.5                                  |
| 105 | Madagascar                       | 24.5                                  |
| 106 | New Zealand                      | 24.8                                  |
| 107 | Lao People's Democratic Republic | 25.1                                  |
| 108 | Zambia                           | 25.1                                  |
| 109 | Trinidad and Tobago              | 25.9                                  |
| 110 | Nigeria                          | 25.9                                  |
| 111 | Greece                           | 26                                    |
| 112 | Liberia                          | 26.3                                  |
| 113 | Russian Federation               | 26.4                                  |
| 114 | Equatorial Guinea                | 26.4                                  |
| 115 | United Republic of Tanzania      | 26.7                                  |
| 116 | Luxembourg                       | 27.3                                  |
| 117 | Viet Nam                         | 27.3                                  |

| No. | List of countries                     | Average seafood intake (g/capita/day) |
|-----|---------------------------------------|---------------------------------------|
| 118 | Chad                                  | 27.7                                  |
| 119 | Indonesia                             | 27.9                                  |
| 120 | Mali                                  | 28.3                                  |
| 121 | Angola                                | 28.5                                  |
| 122 | Saint Vincent and the Grenadines      | 28.5                                  |
| 123 | Myanmar                               | 28.5                                  |
| 124 | Andorra                               | 28.7                                  |
| 125 | Cambodia                              | 28.7                                  |
| 126 | United Kingdom                        | 28.9                                  |
| 127 | Uganda                                | 29.2                                  |
| 128 | Sweden                                | 29.8                                  |
| 129 | Taiwan                                | 29.9                                  |
| 130 | Benin                                 | 30.1                                  |
| 131 | Sri Lanka                             | 30.1                                  |
| 132 | Suriname                              | 30.3                                  |
| 133 | Democratic People's Republic of Korea | 30.3                                  |
| 134 | Guinea                                | 30.6                                  |
| 135 | France                                | 31                                    |
| 136 | China                                 | 31.3                                  |
| 137 | Peru                                  | 31.5                                  |
| 138 | Italy                                 | 31.6                                  |
| 139 | Malta                                 | 31.6                                  |
| 140 | Thailand                              | 32.1                                  |
| 141 | Finland                               | 32.1                                  |
| 142 | Togo                                  | 33.2                                  |
| 143 | Bahamas                               | 33.8                                  |
| 144 | Chile                                 | 33.9                                  |
| 145 | Philippines                           | 33.9                                  |
| 146 | Dominica                              | 33.9                                  |
| 147 | Congo                                 | 34                                    |
| 148 | Mauritania                            | 35                                    |
| 149 | Jamaica                               | 35                                    |
| 150 | Brazil                                | 35.4                                  |
| 151 | Cameroon                              | 35.7                                  |
| 152 | Malaysia                              | 36                                    |
| 153 | Paraguay                              | 36.1                                  |
| 154 | Cape Verde                            | 36.7                                  |
| 155 | Gabon                                 | 36.7                                  |
| 156 | Cote d'Ivoire                         | 37.2                                  |
| 157 | Singapore                             | 37.7                                  |
| 158 | Fiji                                  | 38.1                                  |
| 159 | Barbados                              | 38.7                                  |
| 160 | Saint Lucia                           | 39                                    |
| 161 | Papua New Guinea                      | 39.3                                  |
| 162 | Seychelles                            | 39.7                                  |
| 163 | Grenada                               | 40.7                                  |
| 164 | Sierra Leone                          | 40.8                                  |
| 165 | Comoros                               | 40.9                                  |
| 166 | Guyana                                | 41.8                                  |
| 167 | Vanuatu                               | 42.2                                  |
| 168 | Gambia                                | 42.3                                  |
| 169 | Micronesia (Federated States of)      | 42.7                                  |
| 170 | Antigua and Barbuda                   | 42.9                                  |
| 171 | Marshall Islands                      | 43.6                                  |
| 172 | Sao Tome and Principe                 | 44.3                                  |
| 173 | Tonga                                 | 45.6                                  |
| 174 | Senegal                               | 45.9                                  |
| 175 | Denmark                               | 47.6                                  |
| 176 | Solomon Islands                       | 47.9                                  |

| No. | List of countries | Average seafood intake (g/capita/day) |
|-----|-------------------|---------------------------------------|
| 177 | Ghana             | 47.9                                  |
| 178 | Kiribati          | 48.6                                  |
| 179 | Samoa             | 50                                    |
| 180 | Norway            | 50.5                                  |
| 181 | Iceland           | 50.5                                  |
| 182 | Brunei Darussalam | 51.1                                  |
| 183 | Spain             | 54.9                                  |
| 184 | Republic of Korea | 55.5                                  |
| 185 | Portugal          | 56                                    |
| 186 | Maldives          | 61.8                                  |
| 187 | Japan             | 74.9                                  |

**Table S3. Total annual yields of capture fisheries and aquaculture production, amount of fish used for fish meal, and quantity of export and import of fishery products from 1995 to 2015 (kg/year). Source: DoF (1998-2017)**

| Year | Capture fisheries<br>production yields<br>(kg/year) | Aquaculture<br>production yields<br>(kg/year) | Quantity used in<br>fish meal<br>production<br>(kg/year) | Exported fishery<br>products<br>(kg/year) | Imported fishery<br>products<br>(kg/year) |
|------|-----------------------------------------------------|-----------------------------------------------|----------------------------------------------------------|-------------------------------------------|-------------------------------------------|
| 1995 | 3,019,147,000                                       | 553,608,000                                   | 1,796,673,000                                            | 1,191,362,000                             | 700,437,000                               |
| 1996 | 2,994,525,000                                       | 554,704,000                                   | 1,697,918,000                                            | 1,146,239,000                             | 635,609,000                               |
| 1997 | 2,884,492,000                                       | 499,912,000                                   | 1,515,757,000                                            | 1,179,903,000                             | 644,689,000                               |
| 1998 | 2,911,268,000                                       | 594,595,000                                   | 1,323,887,000                                            | 1,286,981,000                             | 716,382,000                               |
| 1999 | 2,932,107,000                                       | 693,778,000                                   | 1,202,283,000                                            | 1,389,400,000                             | 840,804,000                               |
| 2000 | 2,975,165,000                                       | 738,084,000                                   | 1,147,091,000                                            | 1,347,690,000                             | 741,067,000                               |
| 2001 | 2,834,202,000                                       | 814,245,000                                   | 1,437,731,000                                            | 1,391,912,000                             | 869,367,000                               |
| 2002 | 2,842,411,000                                       | 954,603,000                                   | 1,507,644,000                                            | 1,429,230,000                             | 968,695,000                               |
| 2003 | 2,849,623,000                                       | 1,064,403,000                                 | 1,529,028,000                                            | 1,636,426,000                             | 1,074,680,000                             |
| 2004 | 2,839,669,000                                       | 1,259,980,000                                 | 1,555,950,000                                            | 1,636,987,000                             | 1,232,977,000                             |
| 2005 | 2,814,365,000                                       | 1,304,211,000                                 | 1,554,541,000                                            | 1,732,434,000                             | 1,436,978,000                             |
| 2006 | 2,698,803,000                                       | 1,354,277,000                                 | 1,405,305,000                                            | 1,877,047,000                             | 1,468,074,000                             |
| 2007 | 2,304,951,000                                       | 1,370,426,000                                 | 1,312,266,000                                            | 1,829,109,000                             | 1,394,669,000                             |
| 2008 | 1,873,432,000                                       | 1,330,831,000                                 | 1,249,850,000                                            | 1,841,539,000                             | 1,522,893,000                             |
| 2009 | 1,870,646,000                                       | 1,416,659,000                                 | 1,314,915,000                                            | 1,812,614,000                             | 1,565,942,000                             |
| 2010 | 1,810,620,000                                       | 1,252,063,000                                 | 1,294,065,000                                            | 1,911,522,000                             | 1,573,156,000                             |
| 2011 | 1,835,118,000                                       | 1,201,403,000                                 | 1,287,709,000                                            | 1,857,041,000                             | 1,652,617,000                             |
| 2012 | 1,719,600,000                                       | 1,271,997,000                                 | 1,200,327,000                                            | 1,849,598,000                             | 1,646,865,000                             |
| 2013 | 1,824,836,000                                       | 997,251,000                                   | 1,083,325,000                                            | 1,621,772,000                             | 1,659,882,000                             |
| 2014 | 1,670,080,000                                       | 897,762,000                                   | 973,360,000                                              | 1,626,955,000                             | 1,603,700,000                             |
| 2015 | 1,501,317,000                                       | 928,538,000                                   | 845,609,000                                              | 1,530,995,000                             | 1,594,429,000                             |

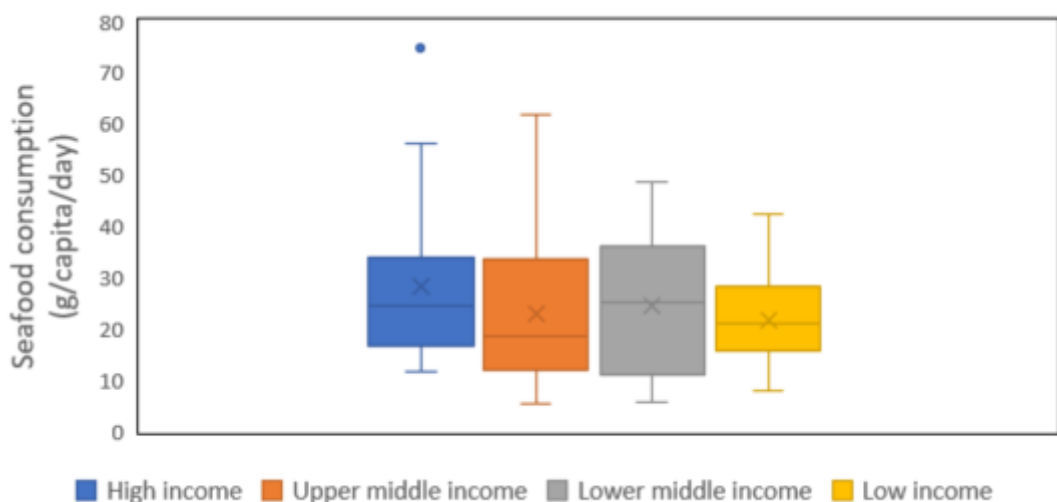

**Figure S1. Per capita seafood consumption in 187 countries, which were taken from the Global Dietary Database (2019). This data could be broadly classified into four groups: (1) High income; (2) Upper middle income; (3) Lower middle income; and (4) Low income. Box plots display 10<sup>th</sup>, 25<sup>th</sup>, 50<sup>th</sup>, 75<sup>th</sup> and 90<sup>th</sup> percentiles, and individual data points outside the 10<sup>th</sup> and 90<sup>th</sup> percentiles. x represent the mean of per capita seafood consumption.**
